# Supplementary material for: Evidence for Centromere Drive in the Holocentric Chromosomes of Caenorhabditis
Source: PubMed Central journal article supplement (PMC3264583; doi:10.1371/journal.pone.0030496), 2012-01-23
Supplement: pone.0030496.s001.pdf [file pone.0030496.s001.pdf]

### CENH3<sup>HCP3</sup> nucleotide based tree

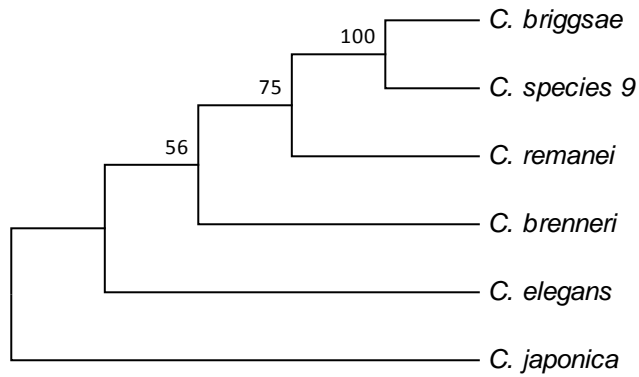

### CENH3<sup>HCP3</sup> amino acid based tree

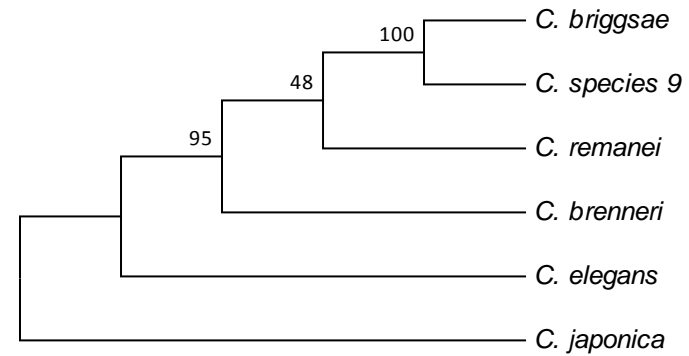

### CENP-C<sup>HCP4</sup> nucleotide based tree

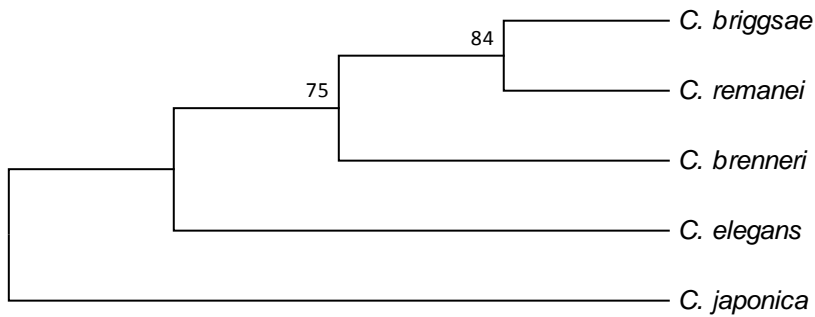

### CENP-C<sup>HCP4</sup> amino acid based tree

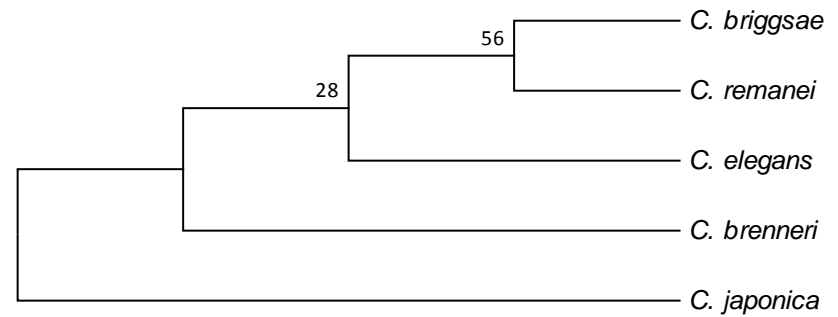

Supplementary File 3: Topologies of CENH3<sup>HCP3</sup> and CENP-C<sup>HCP4</sup> sequences inferred from nucleotide and amino acid alignments. The numbers above branches indicate bootstrap values.
